# Supplementary material for: Postsynthetic functionalization of water stable zirconium metal organic frameworks for high performance copper removal
Source: Royal Society of Chemistry journal article supplement (doi:10.1039/c9an00981g), 2019-01-01
Supplement: c9an00981g1.pdf [file c9an00981g1.pdf]

*Supporting Information*

**Postsynthetic functionalization of water stable zirconium metal organic frameworks for high performance copper removal**

Yao Xie,<sup>a</sup> Guiqin Ye,<sup>a</sup> Suping Peng,<sup>a</sup> Shiyuan Jiang,<sup>a</sup> Yang Wang,<sup>\*a</sup> and Xiaoya Hu<sup>\*a</sup>

<sup>a</sup> School of Chemistry and Chemical Engineering, Yangzhou University, Yangzhou 225002, China.

\* E-mail: wangyzu@126.com; xyhu@yzu.edu.cn

Table S1 BET surface areas and pore volumes of MMPF-6 and MMPF-6-SH

|                                             | MMPF-6 | MMPF-6-SH |
|---------------------------------------------|--------|-----------|
| Surface area ( $\text{m}^2 \text{g}^{-1}$ ) | 2188   | 1436      |
| Pore volume ( $\text{cm}^3 \text{g}^{-1}$ ) | 1.309  | 0.9036    |

Table S2 Isotherms parameters for the adsorption of Cu(II)

| Metal ion | Langmuir adsorption isotherm |                              |        | Freundlich adsorption isotherm |        |        |
|-----------|------------------------------|------------------------------|--------|--------------------------------|--------|--------|
|           | $q_m$ ( $\text{mg g}^{-1}$ ) | $K_L$ ( $\text{L mg}^{-1}$ ) | $R^2$  | $K_F$ ( $\text{L g}^{-1}$ )    | $1/n$  | $R^2$  |
| Copper    | 42.70                        | 0.01220                      | 0.9970 | 1.077                          | 0.6507 | 0.9897 |

Table S3 Kinetic parameters of MMPF-6-SH for the adsorption of Cu(II)

| Metal  | Experimental | Pseudo-first-order kinetic model |                             |        | Pseudo-second-order kinetic model |                                                |        |
|--------|--------------|----------------------------------|-----------------------------|--------|-----------------------------------|------------------------------------------------|--------|
|        |              | $q_e$ ( $\text{mg g}^{-1}$ )     | $k_1$ ( $\text{min}^{-1}$ ) | $R^2$  | $q_e$ ( $\text{mg g}^{-1}$ )      | $K_2$ ( $(\text{g mg}^{-1}) \text{min}^{-1}$ ) | $R^2$  |
| Cu(II) | 4.49         | 2.818                            | 0.1866                      | 0.9937 | 4.872                             | 0.09726                                        | 0.9996 |
